# Supplementary material for: Nutrient removal by Rotala rotundifolia: a superior candidate for ecosystem remediation at low temperatures
Source: Royal Society of Chemistry journal article supplement (doi:10.1039/d0ra03405c), 2020-01-01
Supplement: d0ra03405c1.pdf [file d0ra03405c1.pdf]

## Nutrients removal by *Rotala rotundifolia*: a superior candidate for ecosystems remediation at low temperature

Yunlong Yang<sup>a</sup>, Xiaying Zhang<sup>a</sup>, Jibo Xiao<sup>a,d</sup>, Shuyi Chu<sup>b,\*</sup>, Zhida Huang<sup>c,\*</sup>

<sup>a</sup>College of Life and Environmental Science, Wenzhou University, Wenzhou 325035, Zhejiang, China

<sup>b</sup>Wenzhou Academy of Agricultural Sciences, Wenzhou 325006, Zhejiang, China

<sup>c</sup>Wenzhou Institute of Industry & Science, Wenzhou 325028, Zhejiang, China

<sup>d</sup>Wenzhou Chuangyuan Environment Technology Co. Ltd., Wenzhou 325036, Zhejiang, China

\*Corresponding author: chusy1981@126.com, 40098008@qq.com

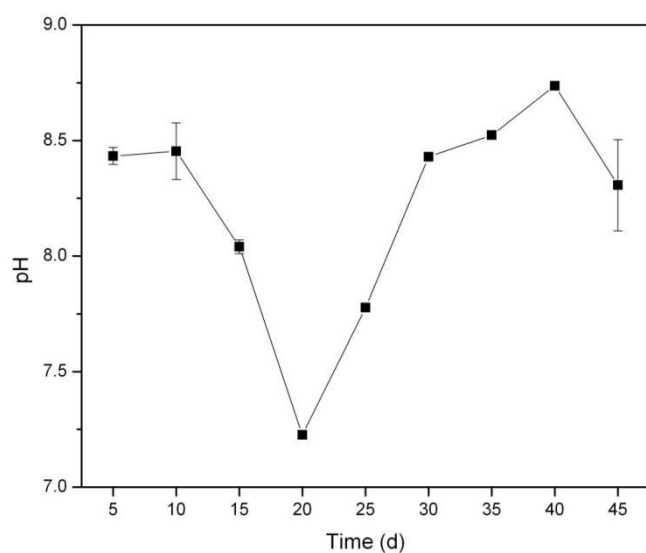

Fig. S1 pH change during the period of pollutants removal at normal temperature.

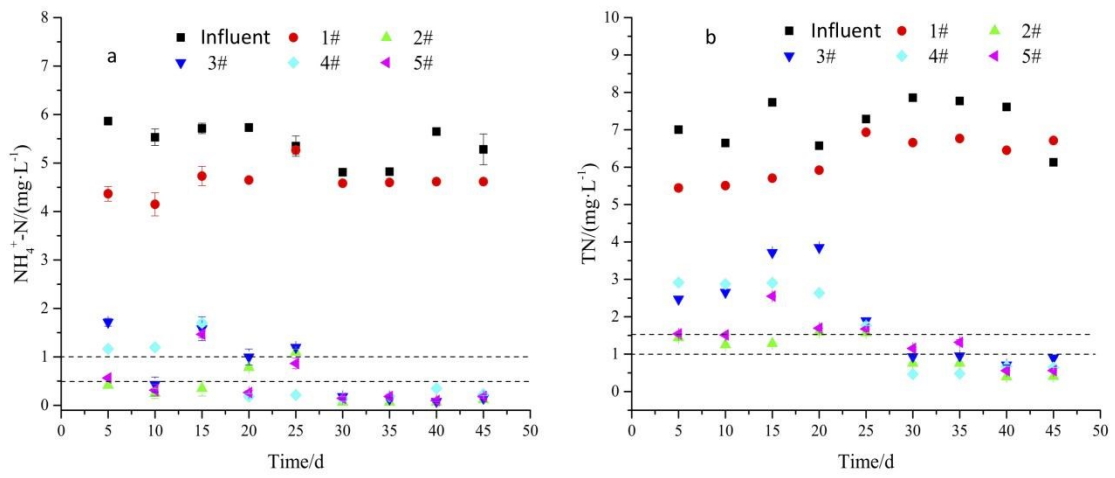

Fig. S2  $\text{NH}_4^+\text{-N}$  (a) and TN (b) removal with and without plant (1#-without plant; 2#-*R. rotundifolia*)

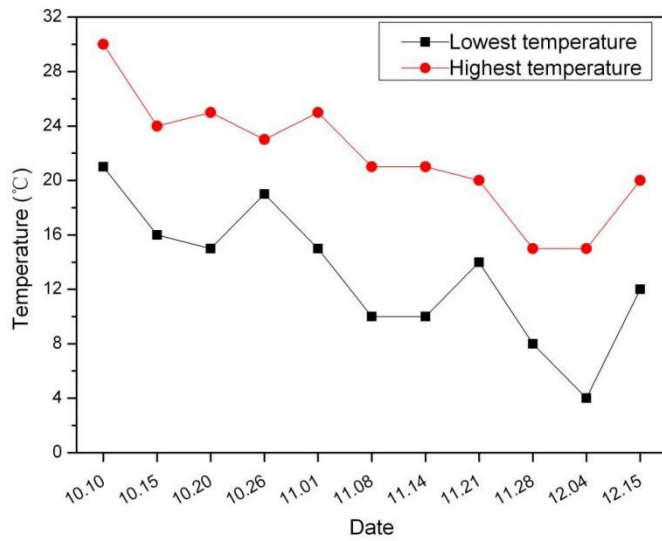

Fig. S3 Variation of atmospheric temperature from October 10th to December 15th in 2019 in Wenzhou City, China

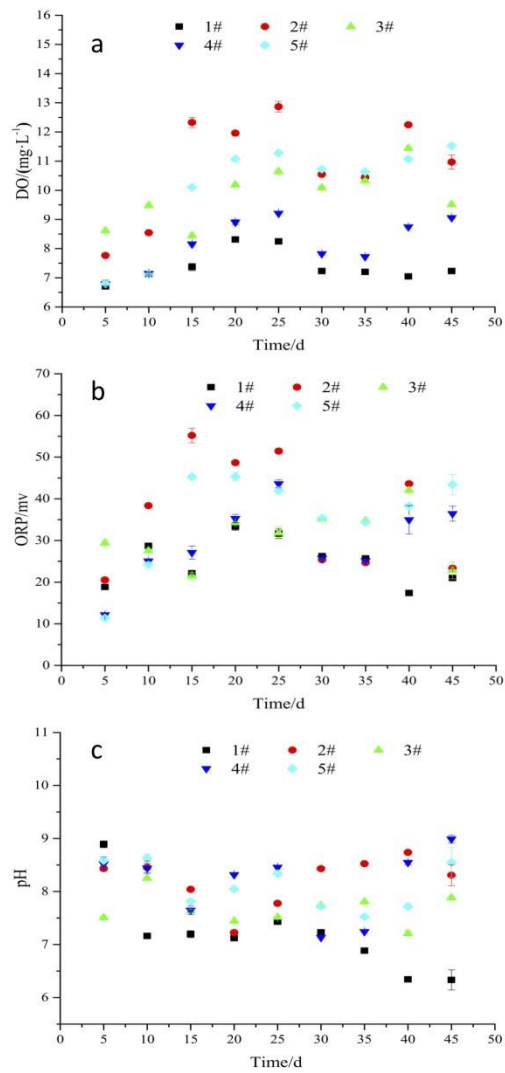

Fig. S4 Changing trend of DO (a), ORP (b) and pH (c) in the overlying water of *R. rotundifolia* at around 28 °C (1#-without plant; 2#-*R. rotundifolia*)

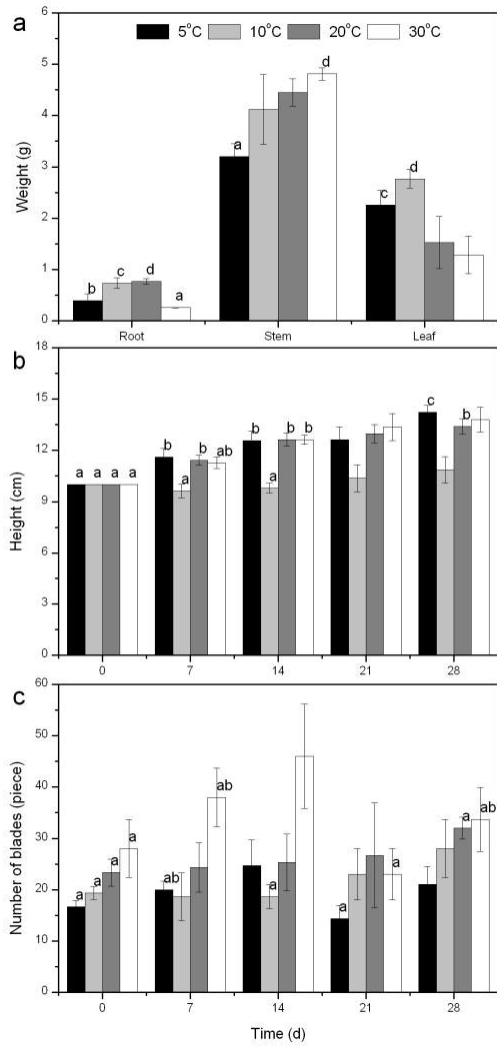

Fig. S5 Organs fresh weight (a), plant height (b) and blades number (c) of *R.rotundifolia*

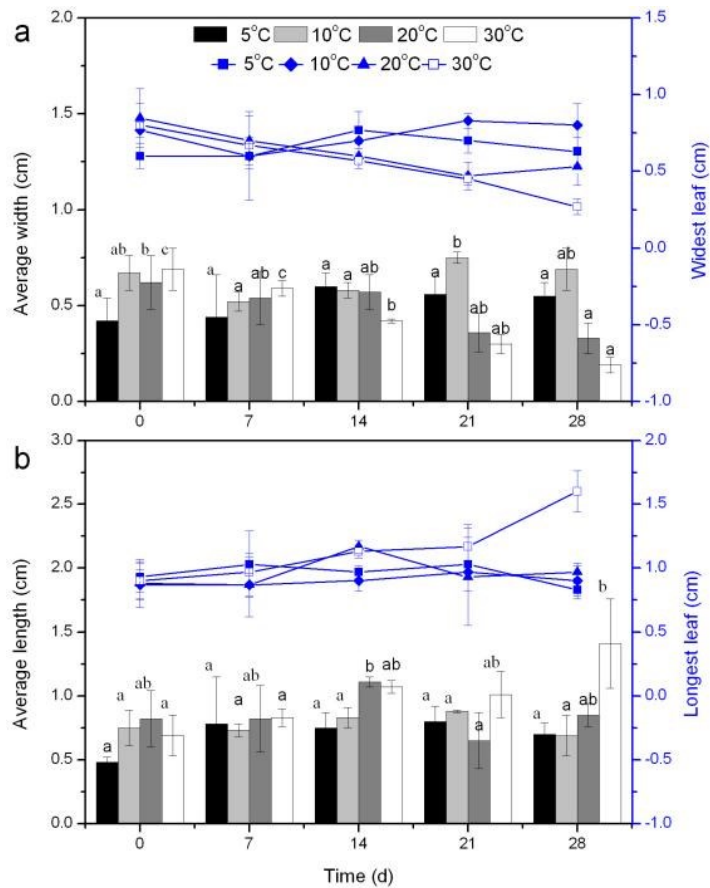

Fig. S6 Variation trend for leaf width (a) and length (b) of *R. rotundifolia*

Table S1 Plant fresh weight (PFW) of the submerged *R. rotundifolia* before and after experiment.

Data was presented as means±S.D.

| Time (d) | PFW (g)   |           |           |           |
|----------|-----------|-----------|-----------|-----------|
|          | 5 °C      | 10 °C     | 20 °C     | 30 °C     |
| 0        | 5.00±0.02 | 5.34±0.07 | 5.17±0.09 | 5.23±0.15 |
| 28       | 5.85±0.28 | 7.61±0.95 | 6.74±0.30 | 6.35±0.29 |

Table S2 *R.rotundifolia* tillers number over time

| Temperature<br>(°C) | Time (d) |    |    |    |    |
|---------------------|----------|----|----|----|----|
|                     | 0        | 7  | 14 | 21 | 28 |
| 5                   | 0        | 0  | 1  | 2  | 4  |
| 10                  | 0        | 10 | 17 | 20 | 24 |
| 20                  | 0        | 1  | 8  | 9  | 15 |
| 30                  | 0        | 2  | 4  | 7  | 13 |

Table S3 Comparison of working temperature between *R. rotundifolia* and some plants

|                        | <i>Myriophyllum<br/>spicatum</i> | <i>Ceratophyllum<br/>demersum</i> | <i>Vallisneria<br/>natans</i> | <i>Potamogeton<br/>crispus</i> | <i>Rotala<br/>rotundifolia</i> |
|------------------------|----------------------------------|-----------------------------------|-------------------------------|--------------------------------|--------------------------------|
| Working<br>temperature | 25 °C                            | 28-32 °C                          | 18.5–23 °C                    | around 4 °C                    | 4-28°C                         |
| Reference              | [1]                              | [2]                               | [3]                           | [4]                            | This study                     |

[1] Y. Bao, Y. Huo, Y. Duan, P. He, M. Wu, N. Yang, B. Sun, Mar. Pollut. Bull., 151 (2020) 110801.

[2] M. Foroughi, P. Najafi, S. Toghiani, N. Honarjoo, Journal of residuals science and technology, 11

(2014) 45-48.

[3] T. Zhu, T. Cao, L. Ni, L. He, C. Yi, C. Yuan, P. Xie, *Ecol. Eng.*, 86 (2016) 113-119.

[4] J. Fan, J. Zhang, H.H. Ngo, W. Guo, X. Yin, *Bioresour. Technol.*, 218 (2016) 1257-1260.
